# Supplementary material for: Elevated Level of Serum Neurotrophin-4, but Not of Brain-Derived Neurotrophic Factor, in Patients with Chronic Kidney Disease-Associated Pruritus
Source: J Clin Med. 2022 Oct 26;11(21):6292. doi: 10.3390/jcm11216292 (PMC9653946; doi:10.3390/jcm11216292)
Supplement: Supplementary file 1 [file jcm-11-06292-s001.zip › jcm-1969348-supplementary.pdf]

| Poniższe pytania dotyczą Państwa odczuć związanych ze swędzącą chorobą skóry. Proszę zaznaczyć odpowiedź, która najdokładniej opisuje Państwa doznania | Jak często w ciągu ostatniego tygodnia poniższe stwierdzenia odnosiły się do Państwa sytuacji? |        |         |        |           |
|--------------------------------------------------------------------------------------------------------------------------------------------------------|------------------------------------------------------------------------------------------------|--------|---------|--------|-----------|
|                                                                                                                                                        | Nigdy                                                                                          | Rzadko | Czasami | Często | Cały czas |
| 1. Zmiany skórne spowodowane swędzącą chorobą skóry krwawią                                                                                            | 1                                                                                              | 2      | 3       | 4      | 5         |
| 2. Zmiany skórne spowodowane swędzącą chorobą skóry bołą                                                                                               | 1                                                                                              | 2      | 3       | 4      | 5         |
| 3. Zmiany skórne spowodowane swędzącą chorobą skóry pieką i kłują                                                                                      | 1                                                                                              | 2      | 3       | 4      | 5         |
| 4. Mam blizny z powodu swędzącej choroby skóry                                                                                                         | 1                                                                                              | 2      | 3       | 4      | 5         |
| 5. Muszę drapać się w miejscach swędzenia skóry                                                                                                        | 1                                                                                              | 2      | 3       | 4      | 5         |
| 6. Zmiany temperatury lub pór roku nasilają odczuwaną przeze mnie swędzącą chorobę skóry                                                               | 1                                                                                              | 2      | 3       | 4      | 5         |
| 7. Wydaje mnóstwo pieniędzy na leczenie swędzącej choroby skóry                                                                                        | 1                                                                                              | 2      | 3       | 4      | 5         |
| 8. Swędząca choroba skóry sprawa, że ciężko jest mi pracować lub robić to, co lubię                                                                    | 1                                                                                              | 2      | 3       | 4      | 5         |
| 9. Swędząca choroba skóry wpływa na moje kontakty z innymi ludźmi (np. rodzina, przyjaciele, bliskie relacje itd.)                                     | 1                                                                                              | 2      | 3       | 4      | 5         |
| 10. Swędząca choroba skóry źle wpływa na mój sen                                                                                                       | 1                                                                                              | 2      | 3       | 4      | 5         |
| 11. Swędząca choroba skóry często nie pozwala mi się skoncentrować                                                                                     | 1                                                                                              | 2      | 3       | 4      | 5         |
| 12. Swędząca choroba skóry ogranicza rodzaje ubrań, które noszę                                                                                        | 1                                                                                              | 2      | 3       | 4      | 5         |
| 13. Swędząca choroba skóry zmusza mnie do kupowania specjalnych środków do prania i płynów kosmetycznych                                               | 1                                                                                              | 2      | 3       | 4      | 5         |
| 14. Frustruję się z powodu choroby skóry                                                                                                               | 1                                                                                              | 2      | 3       | 4      | 5         |
| 15. Wstydzę się z powodu choroby skóry                                                                                                                 | 1                                                                                              | 2      | 3       | 4      | 5         |
| 16. Świąd skóry doprowadza mnie do szału                                                                                                               | 1                                                                                              | 2      | 3       | 4      | 5         |
| 17. Swędząca choroba skóry sprawa, że jestem zły/a lub łatwo się denerwuję                                                                             | 1                                                                                              | 2      | 3       | 4      | 5         |
| 18. Swędząca choroba skóry sprawia, że czuję się smutny/a lub popadam w depresję                                                                       | 1                                                                                              | 2      | 3       | 4      | 5         |
| 19. Martwię się tym, co myślą inni ludzie w związku ze stanem choroby skóry                                                                            | 1                                                                                              | 2      | 3       | 4      | 5         |
| 20. Martwię się, że swędzenie będzie trwać wiecznie                                                                                                    | 1                                                                                              | 2      | 3       | 4      | 5         |
| 21. Z powodu choroby skóry czuję się zbyt skupiony/a na stanie swojej skóry                                                                            | 1                                                                                              | 2      | 3       | 4      | 5         |
| 22. Z powodu stanu choroby skóry zmieniła się moja osobowość                                                                                           | 1                                                                                              | 2      | 3       | 4      | 5         |

SUMA PUNKTÓW: .....

Figure S1 Polish version of the ItchyQoL questionnaire
